# Supplementary material
Source: Springer Nature journal article supplement (https://www.springermedizin.de/resource/supplementary/12890_2010_257_MOESM1_ESM.pdf/9504814)

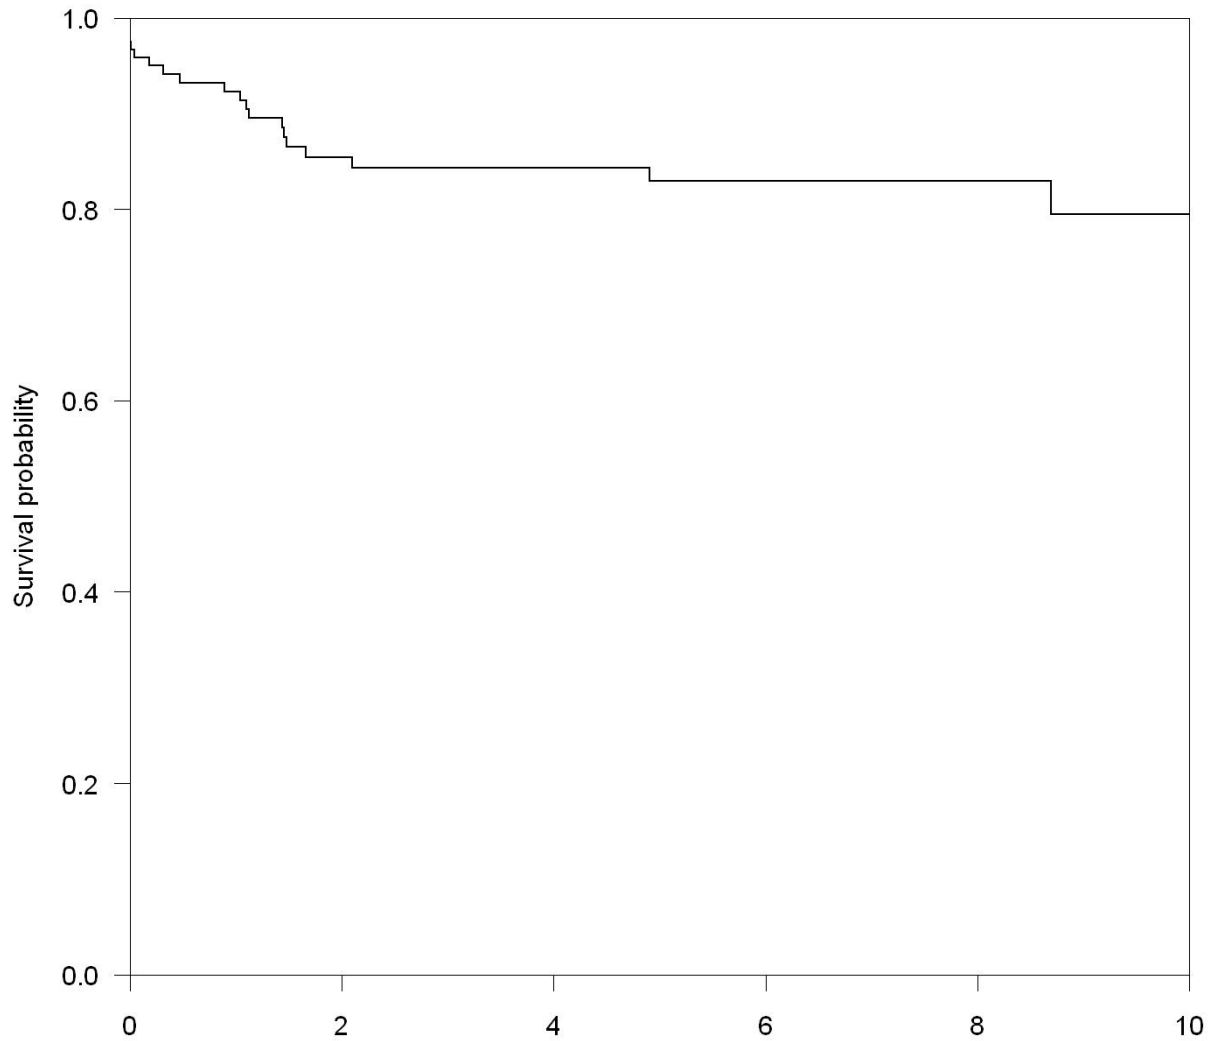

Number at risk:

Years after TB diagnosis

1. 120

80

63

45

28

12

Supplement: MOESM1 [file 9504814]
